# Supplementary material for: Decomposition, decoupling and dynamic prediction of carbon emissions from city-level building operations: a case study of the Yangtze River Delta
Source: Frontiers journal article supplement (doi:10.3389/fenvs.2024.1388739), 2024-05-28
Supplement: Data_Sheet_1.docx [file Data_Sheet_1.docx]

Supplementary Material

# Calculation of the carbon emission factor

(1) Direct carbon emission factor

In this study, the calculation of the direct carbon emission factor was performed based on the calculation method from the IPCC. The calculation process is shown in Equation (S1).

where is the direct carbon emission factor from different energy sources; is the average minimum calorific value of energy j, obtained from the appendix of the *China Energy Statistical Yearbook-2022*; and refers to the carbon content per unit calorific value and the energy oxidation rate of energy j, obtained from the *Standard for Building Carbon Emission Calculation GB/T51366-2019.*

**Table S1.** Decoupling results between PB’s carbon emissions and disposable income in 41cities in the YRD region

| **Energy types** | **Carbon emission coefficient** |
| --- | --- |
| Raw Coal | 1.9003 kgCO2/kg |
| Briquettes | 1.3178 kgCO2/kg |
| Gasoline | 2.9251 kgCO2/kg |
| Diesel Oil | 3.0959 kgCO2/kg |
| LPG | 3.1013 kgCO2/kg |
| Natural Gas | 2.1622 kg CO2/m3 |
| Fuel Oil | 3.1705 kgCO2/kg |
| Kerosene | 3.0179 kgCO2/kg |

(2) Indirect carbon emission factor

Provincial electricity carbon emission factors, available only for 2010 and 2018, were released by the National Development and Reform Commission and the Ministry of Ecological Environment. Since electricity accounts for a relatively large proportion of the energy structure, the annual electricity carbon emission factor needs to be updated in the calculation. The electricity carbon emission factor is calculated by Eq. (S2).

where is the carbon emissions from thermal power generation, is the thermal power generation, and is the renewable energy generation.

Figure A shows the values and trends of electrical carbon emission factors in various provinces and cities in the YRD region from 2005 to 2021. There has been a significant decrease in the electricity-related carbon emission factor due to technological advancements and energy structure adjustments.

| 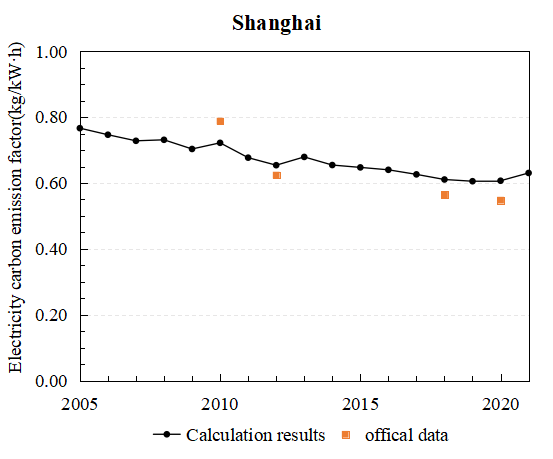 | 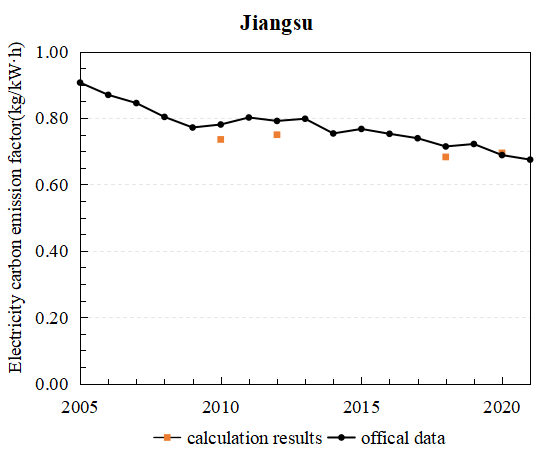 |
| --- | --- |
| 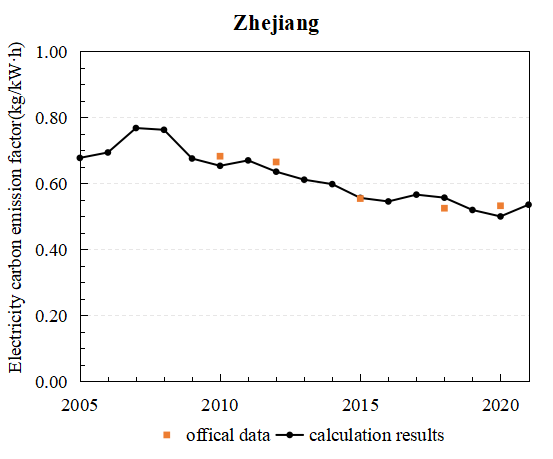 | 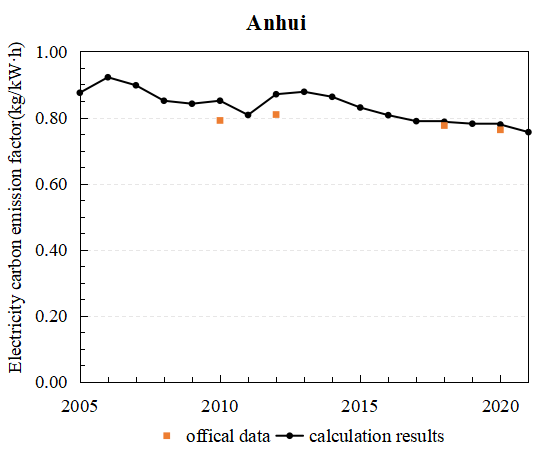 |
| **Figure S1.** Electricity carbon emission factor in Shanghai, Jiangsu, Zhejiang, Anhui Province and | |

# Decoupling results

**Table S2.** Decoupling results between PB’s carbon emissions and disposable income in 41cities in the YRD region

|  | **2006-2011** | | **2011-2016** | | **2016-2021** | |
| --- | --- | --- | --- | --- | --- | --- |
|  | **φ** | **State** | **φ** | **State** | **φ** | **State** |
| Shanghai | 1.48 | END | 0.90 | END | 0.66 | END |
| Nanjing | 2.44 | END | 1.65 | END | 2.52 | END |
| Wuxi | 2.80 | END | 1.09 | END | 1.91 | END |
| Xuzhou | 4.73 | END | 2.82 | END | 4.49 | END |
| Changzhou | 1.70 | END | 1.66 | END | 1.87 | END |
| Suuzhou | 1.71 | END | 1.58 | END | 1.98 | END |
| Nantong | 3.32 | END | 2.73 | END | 3.51 | END |
| Lianyungang | 3.74 | END | 2.26 | END | 4.21 | END |
| Huai’an | 4.33 | END | 2.38 | END | 5.61 | END |
| Yancheng | 6.79 | END | 2.74 | END | 5.72 | END |
| Yangzhou | 3.07 | END | 1.13 | END | 3.03 | END |
| Zhenjiang | 1.67 | END | 3.09 | END | 2.98 | END |
| Taizhou(JS) | 3.46 | END | 2.10 | END | 5.01 | END |
| Suqian | 5.21 | END | 3.42 | END | 4.26 | END |
| Hangzhou | 2.38 | END | 0.78 | END | 1.77 | END |
| Ningbo | 1.62 | END | 0.10 | END | 1.67 | END |
| Wenzhou | 3.49 | END | -0.52 | WD | 3.32 | END |
| Jiaxing | 3.90 | END | 0.16 | END | 1.49 | END |
| Huzhou | 0.11 | END | 0.62 | END | 3.87 | END |
| Shaoxing | 5.22 | END | 0.31 | END | 0.59 | END |
| Jinhua | 1.47 | END | 0.62 | END | 1.34 | END |
| Quzhou | -1.60 | SD | 0.50 | END | 4.97 | END |
| Zhoushan | 4.77 | END | 0.37 | END | 0.54 | END |
| Taizhou(ZJ) | 2.41 | END | 0.02 | END | 1.44 | END |
| Lishui | 4.06 | END | 0.44 | END | 1.42 | END |
| Hefei | 1.55 | END | 4.80 | END | 2.87 | END |
| Huaiben | 3.62 | END | 5.15 | END | 5.67 | END |
| Bozhou | 3.24 | END | 6.41 | END | 5.19 | END |
| Suzhou | 4.70 | END | 5.55 | END | 5.71 | END |
| Bengbu | 3.37 | END | 4.59 | END | 2.77 | END |
| Fuyang | 5.17 | END | 4.66 | END | 5.23 | END |
| Huainan | 3.74 | END | 2.67 | END | 6.55 | END |
| Chuzhou | 3.99 | END | 5.05 | END | 3.05 | END |
| Liuan | 3.69 | END | 10.79 | END | 5.39 | END |
| Maanshan | 1.22 | END | 5.04 | END | 3.32 | END |
| Wuhu | 1.46 | END | 4.59 | END | 1.82 | END |
| Xuancheng | 2.99 | END | 5.55 | END | 3.65 | END |
| Tongling | 2.25 | END | 1.39 | END | 4.63 | END |
| Chizhou | 3.39 | END | 5.17 | END | 3.27 | END |
| Anqing | 3.86 | END | 6.45 | END | 3.98 | END |
| Huangshan | 2.36 | END | 3.84 | END | 1.64 | END |

**Table S3.** Decoupling results between UR’s carbon emissions and disposable income in 41cities in the YRD region

|  | **2006-2011** | | **2011-2016** | | **2016-2021** | |
| --- | --- | --- | --- | --- | --- | --- |
|  | **φ** | **State** | **φ** | **State** | **φ** | **State** |
| Shanghai | 0.03 | END | 0.95 | END | 1.48 | END |
| Nanjing | 0.71 | END | 1.46 | END | 1.56 | END |
| Wuxi | 0.74 | END | 1.24 | END | 1.36 | END |
| Xuzhou | 3.10 | END | 0.13 | END | 2.87 | END |
| Changzhou | 0.71 | END | 1.39 | END | 1.60 | END |
| Suuzhou | 1.18 | END | 2.02 | END | 1.10 | END |
| Nantong | 1.10 | END | 0.43 | END | 3.64 | END |
| Lianyungang | 2.04 | END | 1.73 | END | 4.97 | END |
| Huai’an | 0.28 | END | 3.22 | END | 3.70 | END |
| Yancheng | 2.43 | END | 1.83 | END | 6.02 | END |
| Yangzhou | 1.21 | END | 1.81 | END | 1.89 | END |
| Zhenjiang | 0.77 | END | 1.49 | END | 2.63 | END |
| Taizhou(JS) | 0.40 | END | 1.66 | END | 3.48 | END |
| Suqian | 2.42 | END | 2.32 | END | 3.61 | END |
| Hangzhou | 1.37 | END | 1.76 | END | 0.55 | END |
| Ningbo | -0.48 | WD | 1.24 | END | 0.86 | END |
| Wenzhou | 3.10 | END | -0.58 | WD | -1.35 | SD |
| Jiaxing | 2.47 | END | -0.20 | WD | 0.38 | END |
| Huzhou | 2.29 | END | 0.67 | END | 1.82 | END |
| Shaoxing | 3.35 | END | 0.86 | END | -0.73 | WD |
| Jinhua | 1.86 | END | 1.09 | END | 0.53 | END |
| Quzhou | 2.21 | END | 0.45 | END | 2.93 | END |
| Zhoushan | 3.75 | END | 0.85 | END | -0.54 | WD |
| Taizhou(ZJ) | 1.65 | END | 0.22 | END | -0.34 | WD |
| Lishui | 2.53 | END | 0.97 | END | 0.20 | END |
| Hefei | 1.73 | END | -0.48 | WD | 0.41 | END |
| Huaiben | -0.89 | WD | 0.10 | END | 1.74 | END |
| Bozhou | 0.57 | END | 0.89 | END | 1.53 | END |
| Suzhou | 0.08 | END | 3.42 | END | -0.01 | WD |
| Bengbu | 0.21 | END | 0.64 | END | -0.14 | WD |
| Fuyang | -0.64 | WD | 1.57 | END | 0.77 | END |
| Huainan | 0.65 | END | -1.52 | SD | -0.19 | WD |
| Chuzhou | -0.31 | WD | -0.36 | WD | 0.63 | END |
| Liuan | -1.41 | SD | 2.07 | END | 1.20 | END |
| Maanshan | 0.44 | END | 1.03 | END | 0.20 | END |
| Wuhu | 0.34 | END | 0.41 | END | 0.27 | END |
| Xuancheng | 0.92 | END | 2.06 | END | 0.83 | END |
| Tongling | 0.03 | END | 0.17 | END | 0.50 | END |
| Chizhou | 0.72 | END | 2.26 | END | -0.34 | WD |
| Anqing | -0.21 | WD | 0.68 | END | 0.56 | END |
| Huangshan | -0.37 | WD | 1.69 | END | 1.16 | END |

**Table S4.** Decoupling results between RR’s carbon emissions and disposable income in 41cities in the YRD region

|  | **2006-2011** | | **2011-2016** | | **2016-2021** | |
| --- | --- | --- | --- | --- | --- | --- |
|  | **φ** | **State** | **φ** | **State** | **φ** | **State** |
| Shanghai | -1.20 | SD | -14.25 | SD | -1.62 | SD |
| Nanjing | 2.33 | END | 4.31 | END | 2.40 | END |
| Wuxi | 2.40 | END | 3.52 | END | 5.43 | END |
| Xuzhou | 6.00 | END | 10.59 | END | 1.33 | END |
| Changzhou | 2.27 | END | 5.19 | END | 2.29 | END |
| Suuzhou | 1.77 | END | 1.93 | END | 4.51 | END |
| Nantong | 5.95 | END | 6.38 | END | 4.36 | END |
| Lianyungang | 10.59 | END | 5.99 | END | 0.31 | END |
| Huai’an | 12.26 | END | 1.33 | END | -0.97 | WD |
| Yancheng | 7.81 | END | 5.71 | END | 1.18 | END |
| Yangzhou | 3.81 | END | 3.59 | END | 2.21 | END |
| Zhenjiang | 2.29 | END | 4.93 | END | -4.33 | SND |
| Taizhou(JS) | 5.89 | END | 4.15 | END | 2.49 | END |
| Suqian | 10.44 | END | 6.46 | END | 0.35 | END |
| Hangzhou | 3.08 | END | 0.87 | END | 10.11 | END |
| Ningbo | 0.83 | END | 0.82 | END | 8.06 | END |
| Wenzhou | 3.43 | END | -0.34 | WD | 15.35 | END |
| Jiaxing | 1.78 | END | -0.25 | WD | 12.05 | END |
| Huzhou | 3.10 | END | 1.61 | END | 5.08 | END |
| Shaoxing | 1.69 | END | 0.36 | END | 11.82 | END |
| Jinhua | 2.75 | END | 0.83 | END | 1.50 | END |
| Quzhou | 4.75 | END | 1.90 | END | 2.62 | END |
| Zhoushan | 3.62 | END | 0.86 | END | 4.11 | END |
| Taizhou(ZJ) | 3.68 | END | 0.38 | END | 1.95 | END |
| Lishui | 6.81 | END | 1.86 | END | -0.28 | WD |
| Hefei | 1.12 | END | 5.76 | END | -6.80 | SD |
| Huaiben | 0.48 | END | 8.36 | END | 4.42 | END |
| Bozhou | 0.64 | END | 4.93 | END | -0.32 | WD |
| Suzhou | 1.08 | END | 5.33 | END | -2.63 | SD |
| Bengbu | 0.83 | END | 6.43 | END | -2.02 | SD |
| Fuyang | 4.06 | END | 5.76 | END | 0.63 | END |
| Huainan | 0.37 | END | 4.46 | END | -1.01 | SD |
| Chuzhou | 1.18 | END | 7.28 | END | -2.57 | SD |
| Liuan | 0.75 | END | 12.92 | END | -2.35 | SD |
| Maanshan | -0.44 | WD | 6.00 | END | 0.67 | END |
| Wuhu | 1.56 | END | 6.16 | END | -0.36 | WD |
| Xuancheng | 2.25 | END | 6.65 | END | -2.31 | SD |
| Tongling | 1.22 | END | 2.56 | END | 2.78 | RD |
| Chizhou | 1.41 | END | 5.47 | END | -3.31 | SD |
| Anqing | -2.31 | SD | 13.63 | END | 1.03 | END |
| Huangshan | -1.24 | SD | 8.40 | END | 1.08 | END |
